# Supplementary material for: Non-covalent interactions involving remote substituents influence the topologies of supramolecular chains featuring hydroxyl-O–H⋯O(hydroxyl) hydrogen bonding in crystals of (HOCH2CH2)2NC(S)N(H)(C6H4Y-4) for Y = H, Me, Cl and NO2
Source: Royal Society of Chemistry journal article supplement (doi:10.1039/d0ce01810d), 2021-01-01
Supplement: d0ce01810d1.pdf [file d0ce01810d1.pdf]

**Non-covalent interactions involving remote substituents influence the topologies of supramolecular chains featuring hydroxyl-O–H···O(hydroxyl) hydrogen bonding in crystals of (4-YC<sub>6</sub>H<sub>4</sub>)N(H)C(=S)N(CH<sub>2</sub>CH<sub>2</sub>OH)<sub>2</sub> for Y = H, Me, Cl and NO<sub>2</sub>**

Sang Loon Tan and Edward R. T. Tiekink\*

Research Centre for Crystalline Materials, School of Science and Technology, Sunway

University, 47500 Bandar Sunway, Selangor Darul Ehsan, Malaysia

**Electronic Supplementary Information**

**Table S1.** A listing of selected electrostatic potentials and charge deviations ( $\Delta V_{\text{ESP}}$ ) for molecules **1-4**.

**Table S2.** List of natural charges for **1-4**.

**Table S3** The  $d_{\text{norm}}$  contact distances for all interactions with  $d_i + d_e < \Sigma$ (van der Waals radii) in **1-4** as determined through Hirshfeld surface analysis, with all X–H bond lengths adjusted to their neutron values.

**Figure S1** HOMO-LUMO mapping for (a) **1**, (b) **2**, (c) **3** and (d) **4**.

**Figure S2** Comparison of the simulated (blue) and experimental (red) PXRD patterns for (a) **1**, (b) **2**, (c) **3** and (d) **4**.

**Figure S3** Crystallographic diagrams for **3**: Side-on and end-on views of the supramolecular chain sustained by hydroxyl-O–H···O(hydroxyl) hydrogen bonding, shown as orange dashed lines.

**Figure S4** The overall two-dimensional fingerprint plots and selected decomposed fingerprint plots delineated into H···O/O···H, H···C/C···H and H···S/S···H surface contacts for (a) **1a**, (b) **1b**, (c) **2**, (d) **3**, (e) **4a** and (f) **4b**, with the internal/external percentage contributions specified for each contact.

**Figure S5** Molecular topology obtained through QTAIM analysis, showing the bond critical point (orange dot) and ring critical point (yellow dot) for C–H $\cdots$  $\pi$ (C=S) interactions present in (a) **2**, (b) **3** and (c) **4**. The embedded diagram shows the corresponding NCI plot of the interaction for the corresponding pairwise molecules. The analogous C–H $\cdots$  $\pi$ (C=S) interaction is absent in **1** and hence, the topology is not shown.

**Figure S6** NCI plots for the molecular dimers of (a) **1**, (b) **2**, (c) **3** and (d) **4** featuring complementary interactions involving C–H $\cdots$ O, C–H $\cdots$  $\pi$  or C–H $\cdots$ C contacts.

**Table S1.** A listing of selected electrostatic potentials and charge deviations ( $\Delta V_{\text{ESP}}$ ) for molecules **1-4**.

| Contact        | $V_{\text{ESP}}$ (kcal/mol) |            |                         |
|----------------|-----------------------------|------------|-------------------------|
|                | H-donor                     | H-acceptor | $\Delta V_{\text{ESP}}$ |
| <b>1</b>       |                             |            |                         |
| O1–H1o···O2    | +55.73                      | -42.01     | 97.74                   |
| C8–H8a···S1    | +29.03                      | -36.09     | 65.12                   |
| C4–H4···S1     | +5.92                       | -35.13     | 41.05                   |
| <b>2</b>       |                             |            |                         |
| O1–H1o···O2    | +55.99                      | -42.45     | 98.44                   |
| C6–H6···O2     | +12.07                      | -45.78     | 57.85                   |
| <b>3</b>       |                             |            |                         |
| O1–H1o···O2    | +59.12                      | -39.60     | 98.72                   |
| C6–H6···O2     | +13.38                      | -40.42     | 53.80                   |
| C10–H10b···Cl1 | +33.16                      | +0.76      | 32.40                   |
| Cl1···Cl1      | -0.94                       | -0.94      | -1.88                   |
| <b>4</b>       |                             |            |                         |
| O1–H1o···O2    | +59.49                      | -39.30     | 98.79                   |
| C10–H10a···S1  | +36.24                      | -30.37     | 66.61                   |
| C11–H11b···O3  | +12.52                      | -36.91     | 49.43                   |
| C7–H7···O3     | +10.23                      | -34.49     | 44.72                   |

**Table S2.** List of natural charges for **1-4**.

| Atom | Natural Charge,  e |        |        |        |
|------|--------------------|--------|--------|--------|
|      | 1                  | 2      | 3      | 4      |
| S1   | -0.393             | -0.397 | -0.387 | -0.361 |
| O1   | -0.737             | -0.737 | -0.737 | -0.736 |
| H1O  | 0.496              | 0.496  | 0.496  | 0.498  |
| O2   | -0.748             | -0.749 | -0.747 | -0.743 |
| H2O  | 0.480              | 0.480  | 0.480  | 0.480  |
| N1   | -0.613             | -0.611 | -0.613 | -0.614 |
| H1N  | 0.444              | 0.444  | 0.445  | 0.448  |
| N2   | -0.396             | -0.397 | -0.393 | -0.384 |
| C1   | 0.345              | 0.346  | 0.344  | 0.338  |
| C2   | 0.141              | 0.126  | 0.141  | 0.195  |
| C3   | -0.215             | -0.205 | -0.197 | -0.222 |
| C4   | -0.208             | -0.212 | -0.224 | -0.169 |
| C5   | -0.226             | -0.024 | -0.053 | -0.010 |
| C6   | -0.205             | -0.209 | -0.222 | -0.164 |
| C7   | -0.234             | -0.224 | -0.216 | -0.235 |
| C8   | -0.249             | -0.249 | -0.249 | -0.25  |
| C9   | -0.08              | -0.08  | -0.08  | -0.08  |
| C10  | -0.25              | -0.249 | -0.25  | -0.251 |
| C11  | -0.075             | -0.075 | -0.075 | -0.075 |
| C5'  | -                  | -0.624 | -      | -      |
| Cl1  | -                  | -      | -0.011 | -      |
| O3   | -                  | -      | -      | -0.398 |
| O4   | -                  | -      | -      | -0.399 |
| N3   | -                  | -      | -      | 0.532  |
| H3   | 0.23               | 0.229  | 0.237  | 0.245  |
| H4   | 0.222              | 0.218  | 0.237  | 0.252  |
| H5   | 0.222              | -      | -      | -      |
| H6   | 0.223              | 0.218  | 0.238  | 0.252  |
| H7   | 0.225              | 0.224  | 0.232  | 0.235  |
| H8a  | 0.224              | 0.223  | 0.224  | 0.226  |
| H8b  | 0.227              | 0.227  | 0.228  | 0.229  |
| H9a  | 0.182              | 0.18   | 0.181  | 0.182  |
| H9b  | 0.181              | 0.181  | 0.182  | 0.184  |
| H10a | 0.233              | 0.233  | 0.234  | 0.234  |
| H10b | 0.216              | 0.216  | 0.217  | 0.219  |
| H11a | 0.169              | 0.169  | 0.17   | 0.171  |
| H11b | 0.17               | 0.17   | 0.17   | 0.171  |
| H5a' | -                  | 0.222  | -      | -      |
| H5b' | -                  | 0.22   | -      | -      |
| H5c' | -                  | 0.221  | -      | -      |

**Table S3** The  $d_{\text{norm}}$  contact distances for all interactions with  $d_i + d_e < \Sigma$  (van der Waals radii) in **1-4** as determined through Hirshfeld surface analysis, with all X–H bond lengths adjusted to their neutron values.

| Type     | Contact   | Distance (Å) | Symmetry operation      |
|----------|-----------|--------------|-------------------------|
| <b>1</b> |           |              |                         |
| I        | H1o···O22 | 1.70         | $x, y, z$               |
| I        | H21o···O2 | 1.70         | $x, y, 1+z$             |
| I        | H28b···O1 | 2.54         | $1-x, 1-y, 1-z$         |
| I        | H5···O1   | 2.54         | $1/2-x, 1/2+y, 1/2-z$   |
| II       | H9a···C22 | 2.68         | $1-x, 1-y, 1-z$         |
| II       | H9a···C23 | 2.70         | $1-x, 1-y, 1-z$         |
| II       | H29b···C7 | 2.71         | $-1/2+x, 1/2-y, 1/2+z$  |
| II       | H29a···C7 | 2.73         | $1-x, 1-y, 1-z$         |
| III      | H4···S21  | 2.85         | $1/2-x, 1/2+y, 1/2-z$   |
| III      | H8a···S21 | 2.83         | $-1/2+x, 1/2-y, -1/2+z$ |
| IV       | C21···O22 | 3.19         | $1-x, 1-y, 1-z$         |
| <b>2</b> |           |              |                         |
| I        | H1o···O2  | 1.74         | $-1/2-x, -1/2+y, 1/2-z$ |
| I        | H6···O2   | 2.55         | $1/2-x, -1/2+y, 1/2-z$  |
| II       | H10b···C6 | 2.65         | $-1/2+x, 1/2-y, -1/2+z$ |
| II       | H9a···C7  | 2.71         | $-1+x, y, z$            |
| II       | H4···C10  | 2.74         | $1/2-x, 1/2+y, 1/2-z$   |
| <b>3</b> |           |              |                         |
| I        | H1o···O2  | 1.73         | $-1/2-x, 1/2+y, 1/2-z$  |
| I        | H6···O2   | 2.51         | $1/2-x, 1/2+y, 1/2-z$   |
| II       | H10a···C6 | 2.67         | $-1/2+x, 1/2-y, -1/2+z$ |
| II       | H4···C10  | 2.73         | $1/2-x, -1/2+y, 1/2-z$  |
| II       | H9b···C7  | 2.75         | $-1+x, y, z$            |

|          |            |      |                                                                |
|----------|------------|------|----------------------------------------------------------------|
| II       | H8a···C5   | 2.78 | -1+x, y, z                                                     |
| V        | H10b···Cl1 | 2.78 | -1 <sup>1/2</sup> +x, 1 <sup>1/2</sup> -y, - <sup>1/2</sup> +z |
| V        | Cl1···Cl1  | 3.44 | 2-x, 1-y, 1-z                                                  |
| <b>4</b> |            |      |                                                                |
| I        | H1o···O22  | 1.75 | x, 1+y, z                                                      |
| I        | H21o···O2  | 1.76 | x, y, z                                                        |
| I        | H29b···O1  | 2.29 | -x, 1-y, 1-z                                                   |
| I        | H11b···O3  | 2.30 | x, y, 1+z                                                      |
| I        | H7···O23   | 2.53 | x, 1+y, -1+z                                                   |
| I        | H27···O3   | 2.55 | x, y, 1+z                                                      |
| I        | H31a···O23 | 2.56 | x, y, -1+z                                                     |
| II       | H30a···C5  | 2.73 | 1-x, 1-y, 1-z                                                  |
| II       | H30a···C4  | 2.75 | 1-x, 1-y, 1-z                                                  |
| II       | H10b···C24 | 2.76 | 1-x, 1-y, 2-z                                                  |
| III      | H30b···S1  | 2.83 | 1-x, 1-y, 1-z                                                  |
| III      | H10a···S21 | 2.86 | 1-x, 1-y, 2-z                                                  |

---

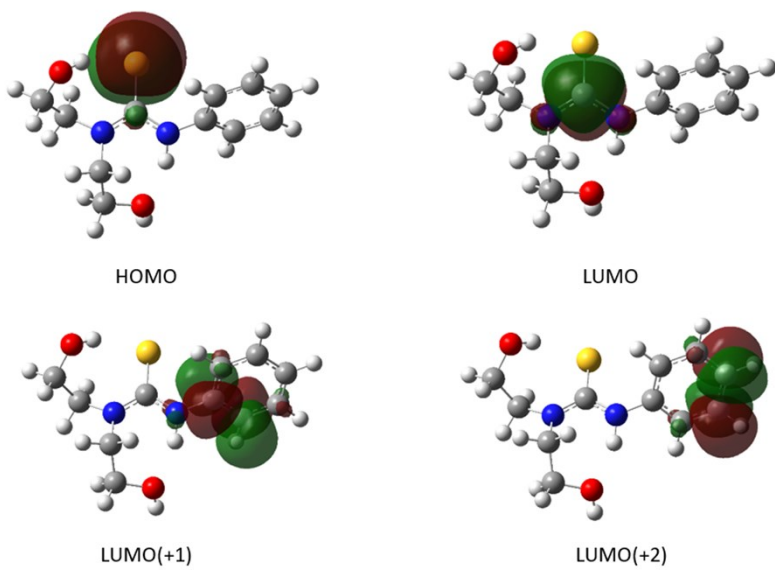

(a)

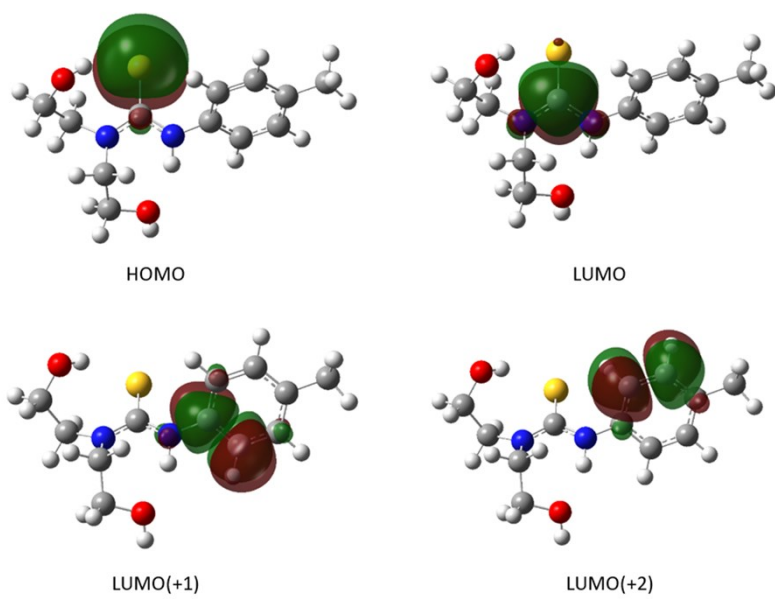

(b)

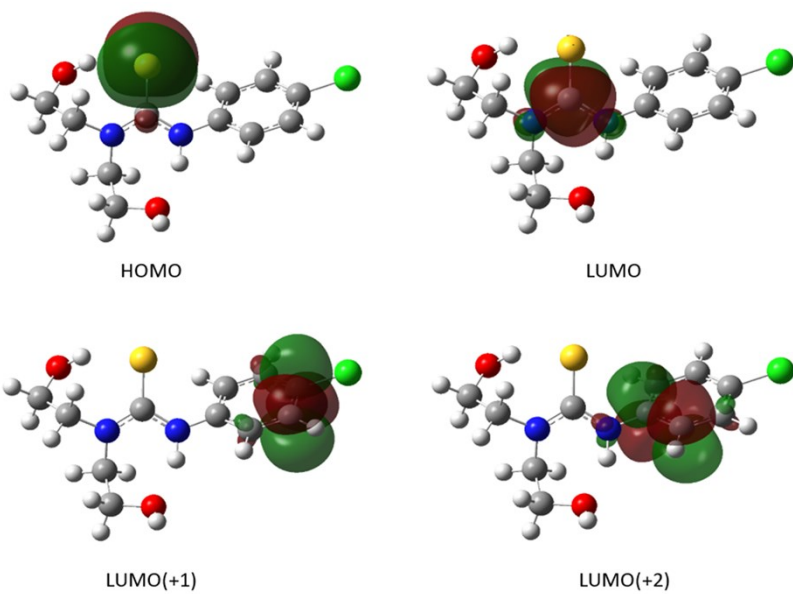

(c)

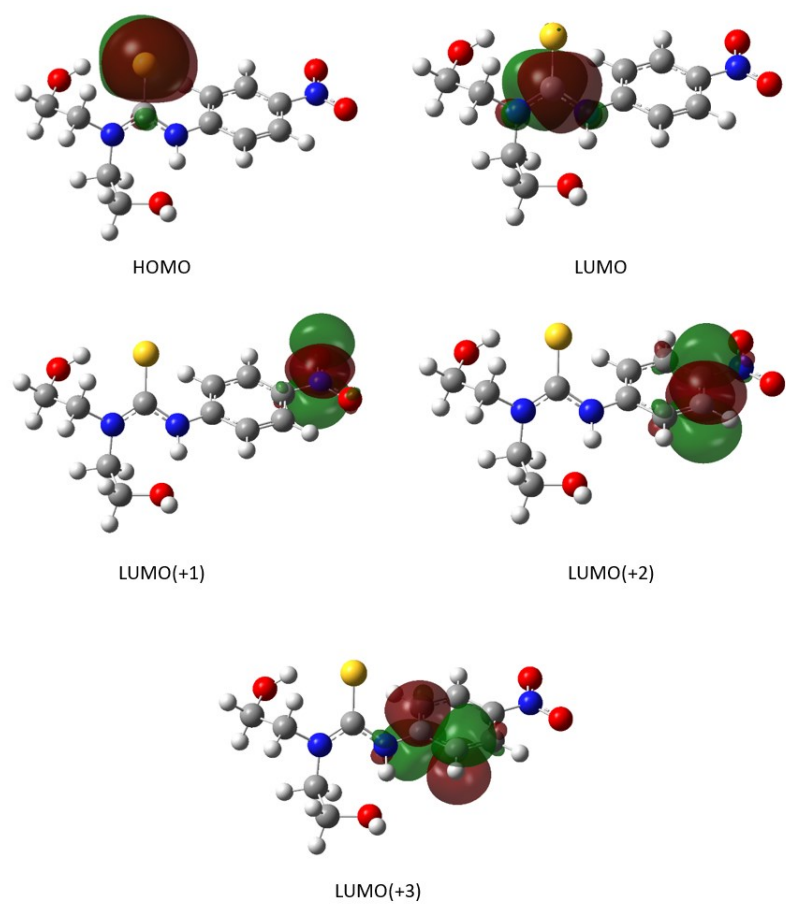

(d)

**Figure S1** HOMO-LUMO mapping for (a) 1, (b) 2, (c) 3 and (d) 4.



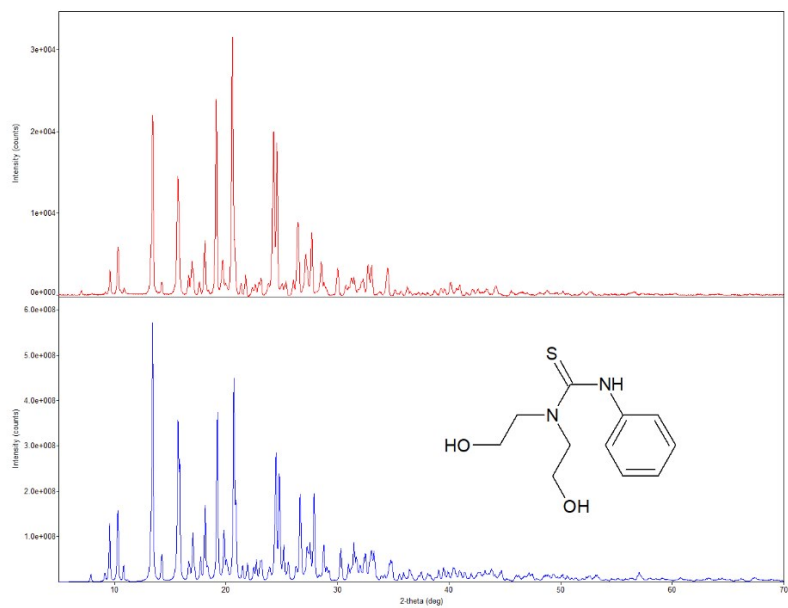

(a)

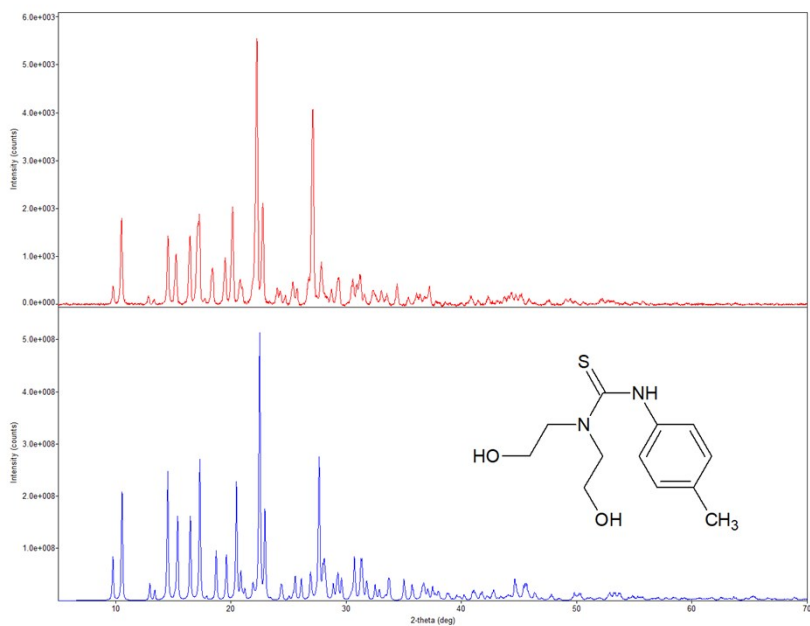

(b)

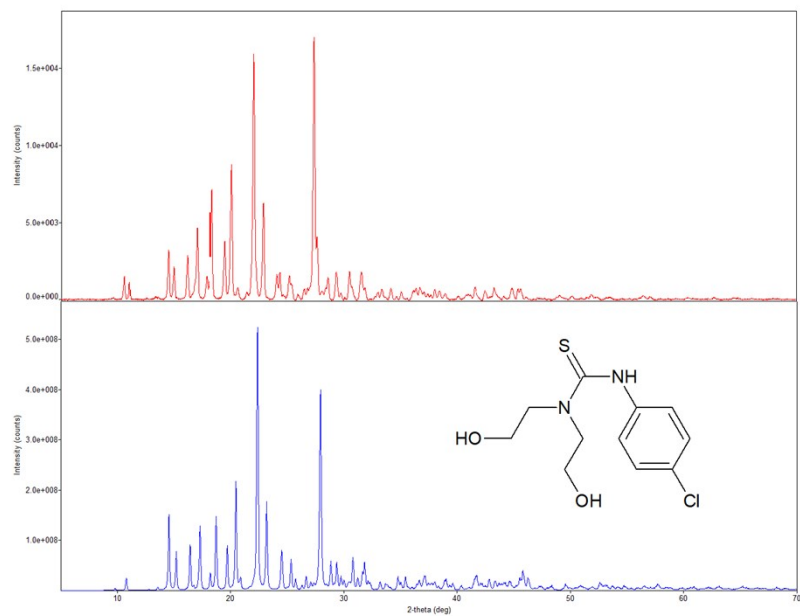

(c)

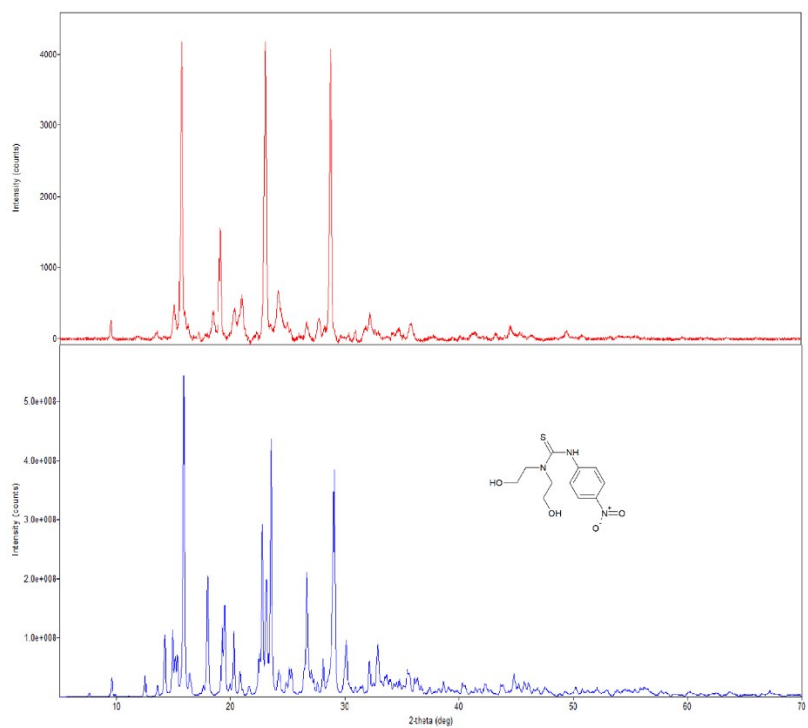

(d)

**Figure S2** Comparison of the simulated (blue) and experimental (red) PXR D patterns for (a)

**1**, (b) **2**, (c) **3** and (d) **4**.

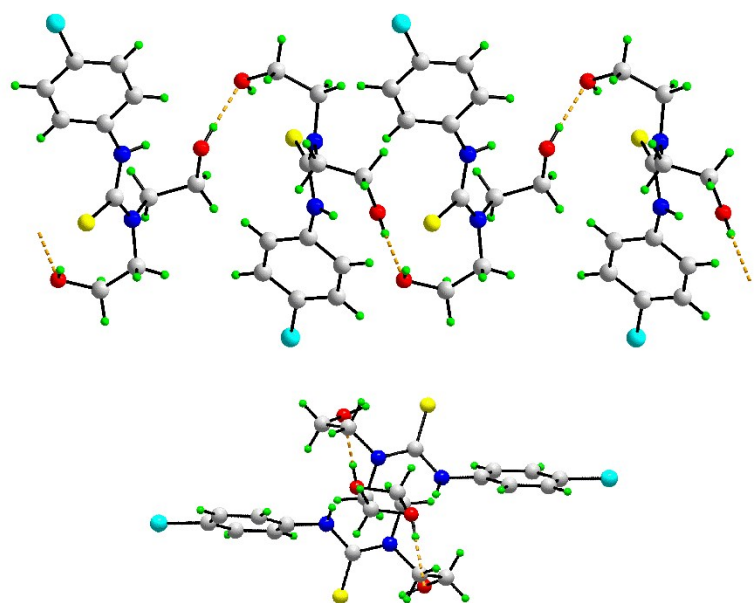

**Figure S3** Crystallographic diagrams for **3**: (a) Side-on and end-on views of the supramolecular chain sustained by hydroxyl-O–H $\cdots$ O(hydroxyl) hydrogen bonding, shown as orange dashed lines.

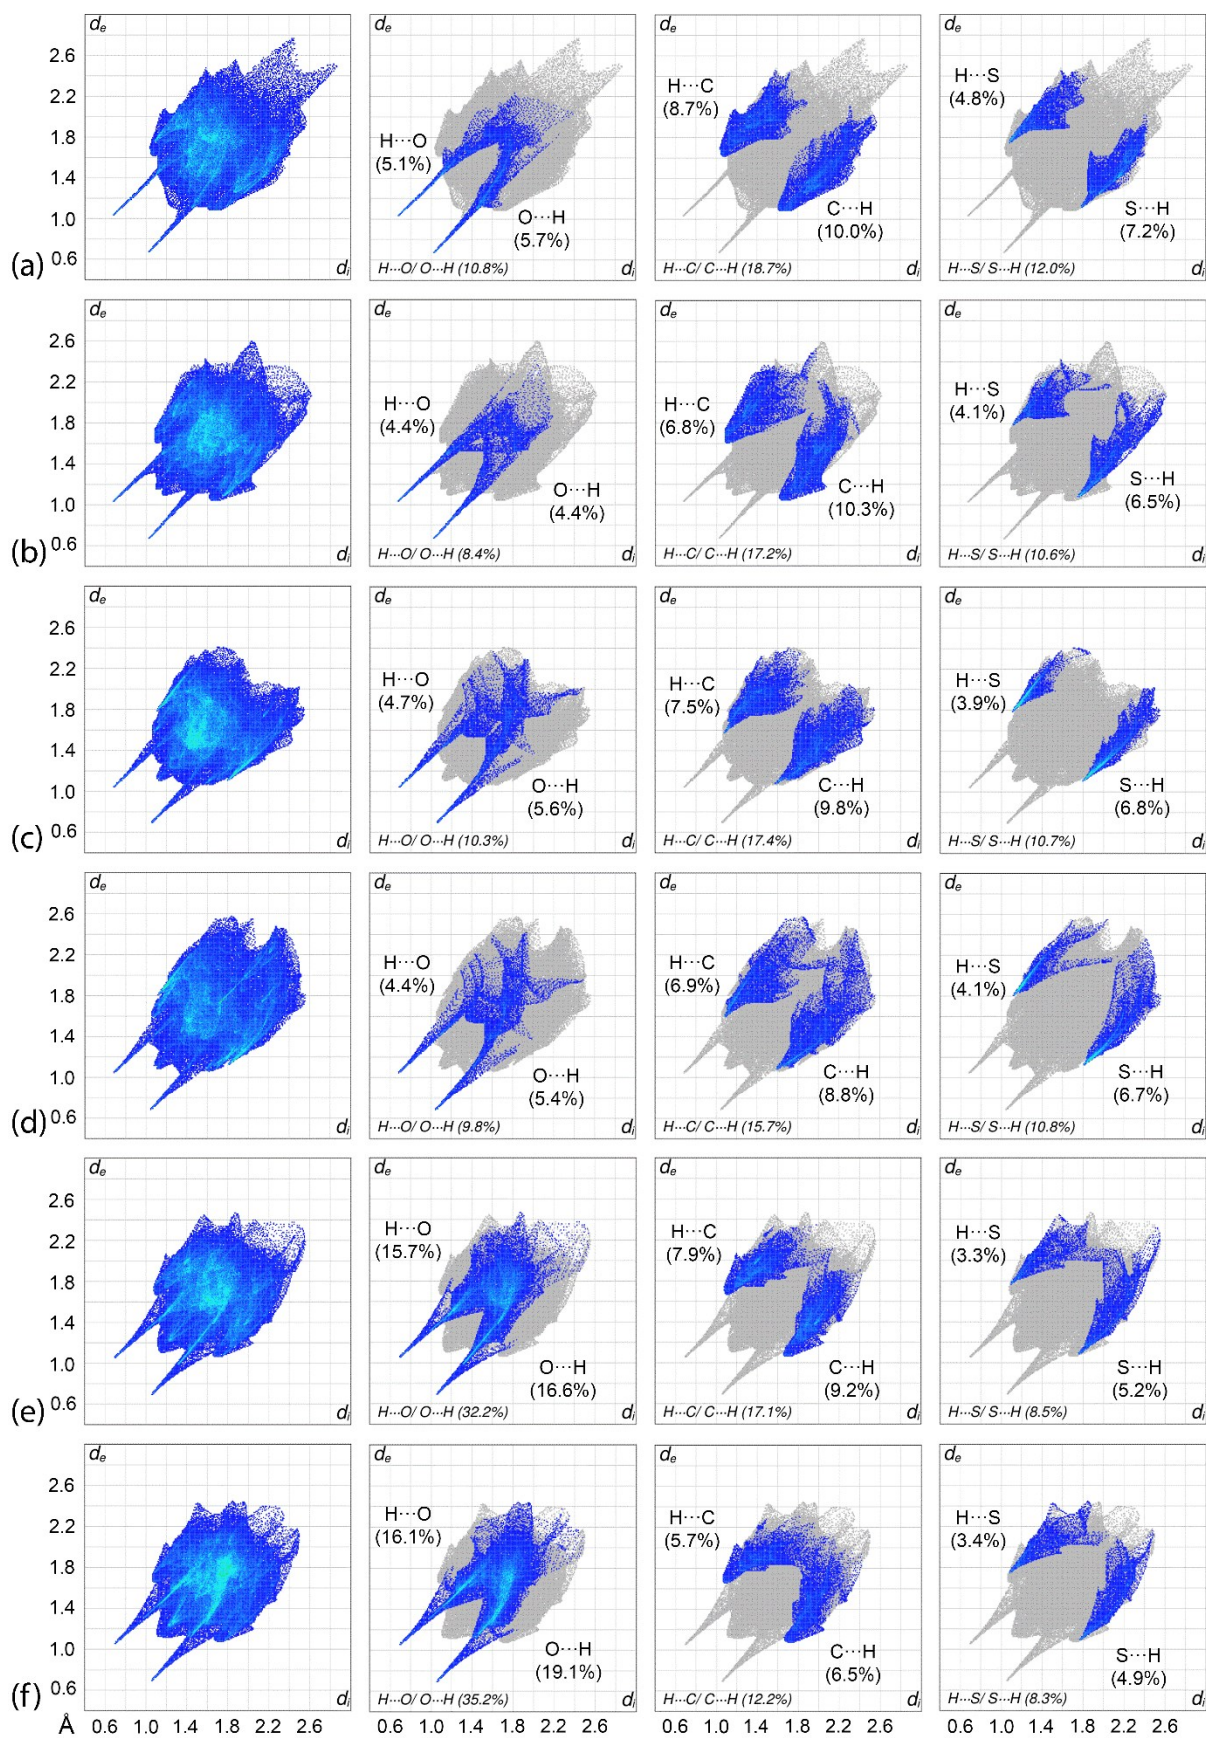

**Figure S4** The overall two-dimensional fingerprint plots and selected decomposed fingerprint plots delineated into H···O/O···H, H···C/C···H and H···S/S···H surface contacts for (a) **1a**, (b) **1b**, (c) **2**, (d) **3**, (e) **4a** and (f) **4b**, with the internal/external percentage contributions specified for each contact.

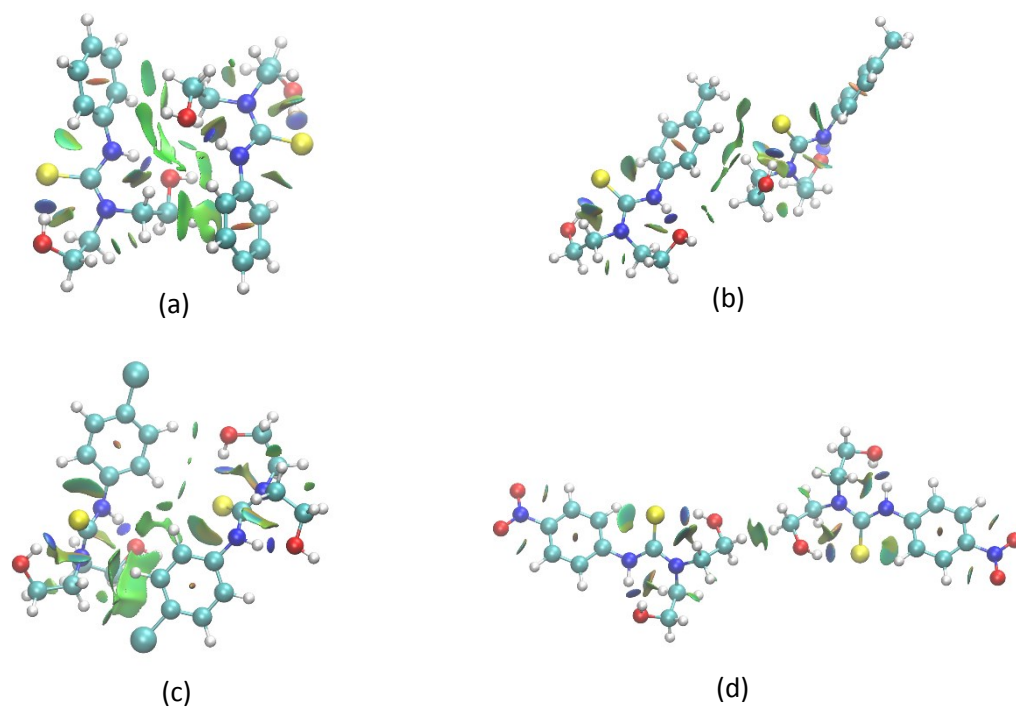

**Figure S5** NCI plots for the molecular dimers of (a) **1**, (b) **2**, (c) **3** and (d) **4** featuring the complementary interactions involving C-H...O, C-H...π or C-H...C contacts.

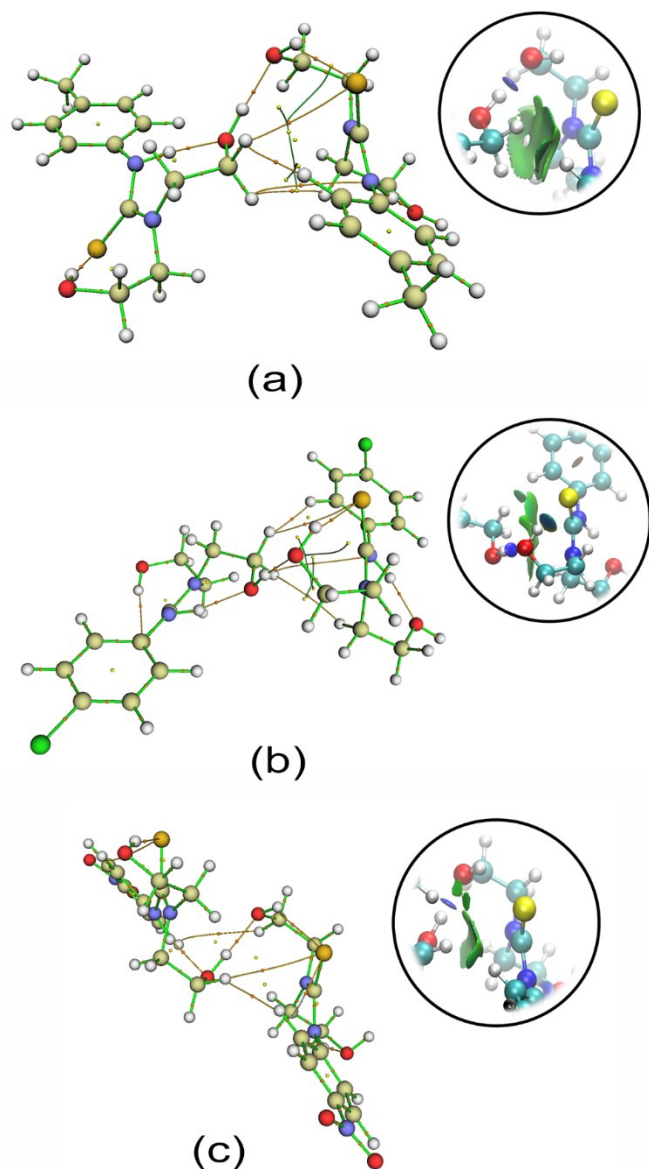

**Figure S6** Molecular topology obtained through QTAIM analysis, showing the bond critical point (orange dot) and ring critical point (yellow dot) for C–H $\cdots$  $\pi$ (C=S) interactions present in (a) **2**, (b) **3** and (c) **4**. The embedded diagram shows the corresponding NCI plot of the interaction for the corresponding pairwise molecules. The analogous C–H $\cdots$  $\pi$ (C=S) interaction is absent in **1** and hence, the topology is not shown.
